# Supplementary material
Source: Springer Nature journal article supplement (https://www.springermedizin.de/resource/supplementary/13049_2010_162_MOESM2_ESM.pdf/9666014)
Supplement: MOESM2 [file 9666014]

PHYSIOLOGIC PARAMETERS

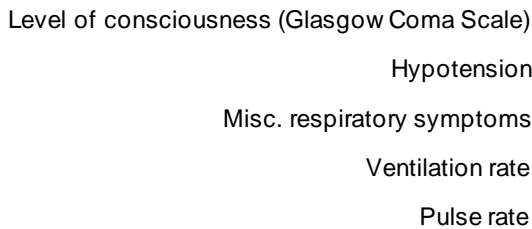

ANATOMIC INJURY

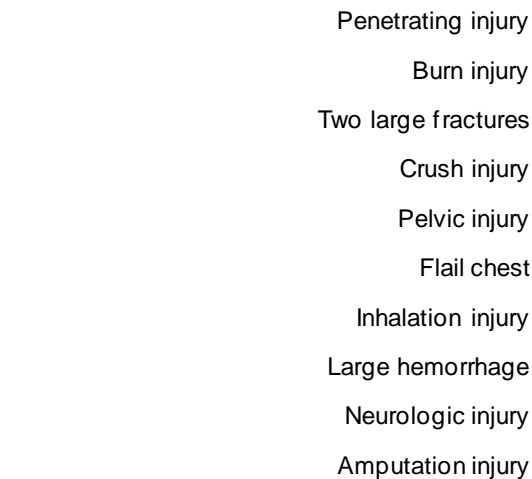

MECHANISM OF INJURY

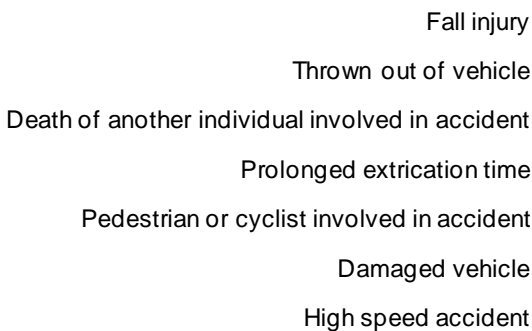

0 5 10 15 20 25 30 35 40 45 50  
**Number of hospitals**

Regional hospitals Central hospitals Local hospitals
